# Supplementary material for: Fabrication of an Extremely Cheap Poly(3,4-ethylenedioxythiophene) Modified Pencil Lead Electrode for Effective Hydroquinone Sensing
Source: MDPI journal article supplement (doi:10.3390/polym13030343), 2021-01-22
Supplement: s1 [file s1]

## **Supplementary materials**

### **Fabrication of an extremely cheap poly(3,4-ethylenedioxythiophene) modified pencil lead electrode for effective hydroquinone sensing**

Jian-Yu Lu <sup>1</sup>, Yu-Sheng Yu <sup>2</sup>, Tung-Bo Chen <sup>1</sup>, Chiung-Fen Chang <sup>3</sup>,  
Sigitas Tamulevičius <sup>4</sup>, Donats Erts <sup>5</sup>, Kevin C.-W. Wu <sup>2</sup> and Yesong Gu <sup>1,\*</sup>

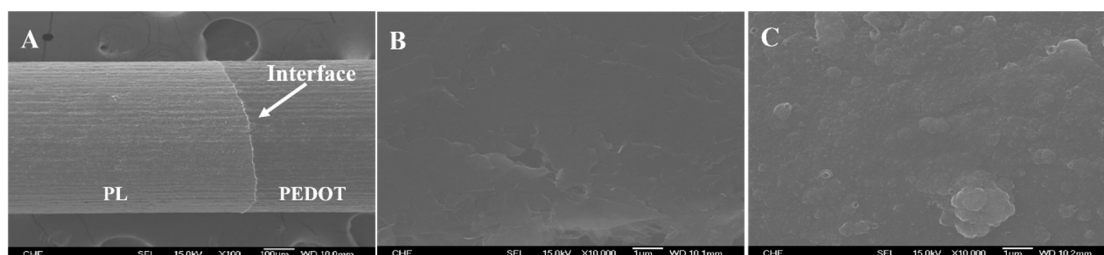

**Figure S1.** The surface images of PL and PEDOT/PL electrodes by SEM. (A) the interface of PEDOT film on the PL electrode. (B) and (C) were the enlarged images of PL and PEDOT film, respectively.

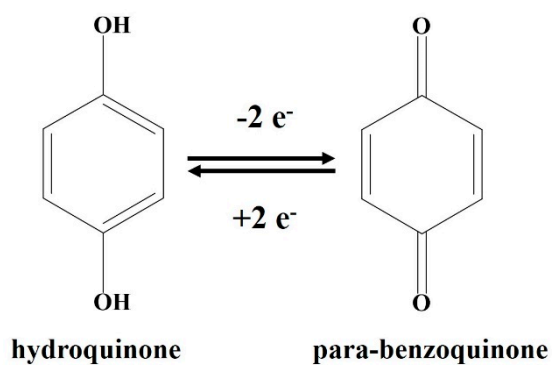

**Figure S2.** The oxidation and reduction mechanism for hydroquinone and para-benzoquinone

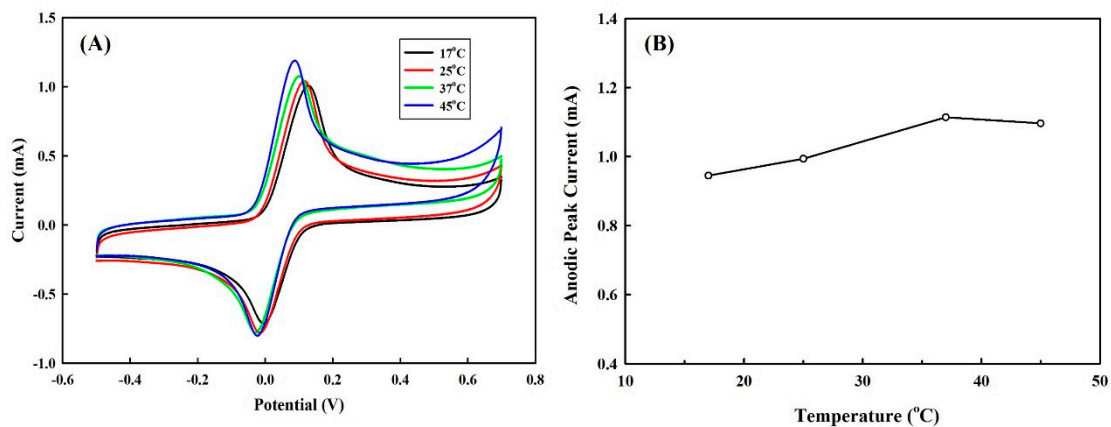

**Figure S3.** (A) The effect of temperature on the performance of PEDOT/PL electrode for the detection of 6 mM of hydroquinone in 100 mM of PBS buffer. The potential was swept from  $-0.5\sim 0.7$  V with different scan rate (B) The effect of temperature on the anodic peak current.
